# Supplementary material for: Monoclonal antibodies and Fc-fusion protein biologic medicines: A multinational cross-sectional investigation of accessibility and affordability in Asia Pacific regions between 2010 and 2020
Source: PubMed Central journal article supplement — Lancet Reg Health West Pac. 2022 Jun 24;26:100506. doi: 10.1016/j.lanwpc.2022.100506 (PMC9249810; doi:10.1016/j.lanwpc.2022.100506), 2022-06-24
Supplement: mmc1.pdf [file mmc1.pdf]

**Supplementary Table 1 Summary of selected biologics available in IQVIA database**

| Modes of action classification                           | Molecule name                  | Target                           |
|----------------------------------------------------------|--------------------------------|----------------------------------|
| <b>Tumour necrosis factor (TNF), N = 5</b>               | etanercept                     |                                  |
|                                                          | infliximab                     |                                  |
|                                                          | adalimumab                     | TNF- $\alpha$                    |
|                                                          | certolizumab pegol             |                                  |
|                                                          | golimumab                      |                                  |
| <b>Interleukin/interleukin receptor (IL),<br/>N = 17</b> | daclizumab                     | CD25                             |
|                                                          | basiliximab                    | CD25                             |
|                                                          | rilonacept                     | IL-1                             |
|                                                          | ustekinumab                    | IL-12/IL-23                      |
|                                                          | tocilizumab                    | IL-6R                            |
|                                                          | canakinumab                    | IL-1                             |
|                                                          | secukinumab                    | IL-17A                           |
|                                                          | siltuximab                     | IL-6                             |
|                                                          | brodalumab                     | IL-17RA                          |
|                                                          | ixekizumab                     | IL-17A                           |
|                                                          | sarilumab                      | IL-6R                            |
|                                                          | guselkumab                     | IL-23                            |
|                                                          | tildrakizumab                  | IL-23                            |
|                                                          | risankizumab                   | IL-23                            |
|                                                          | reslizumab                     | IL5                              |
|                                                          | mepolizumab                    | IL-5                             |
|                                                          | benralizumab                   | IL-5R                            |
| <b>Lymphocyte/adhesion molecules, N = 21</b>             | alefacept                      | CD2                              |
|                                                          | natalizumab                    | $\alpha$ 4 integrin              |
|                                                          | abatacept                      | CD80/CD86                        |
|                                                          | belimumab                      | B cell activating factor (BAFF)  |
|                                                          | vedolizumab                    | $\alpha$ 4 $\beta$ 7 integrin    |
|                                                          | alemtuzumab                    | CD52                             |
|                                                          | ocrelizumab                    | CD20                             |
|                                                          | emapalumab                     | interferon-gamma (IFN $\gamma$ ) |
|                                                          | rituximab                      | CD20                             |
|                                                          | Rituximab + hyaluronidase alfa |                                  |
|                                                          | gemtuzumab ozogamicin          | CD33                             |

|                                                 |                                               |                                               |
|-------------------------------------------------|-----------------------------------------------|-----------------------------------------------|
|                                                 | catumaxomab                                   | EpCAM, CD3                                    |
|                                                 | ofatumumab                                    | CD20                                          |
|                                                 | brentuximab vedotin                           | TNFRSF8                                       |
|                                                 | obinutuzumab                                  | CD20                                          |
|                                                 | blinatumomab                                  | CD19, CD3                                     |
|                                                 | elotuzumab                                    | CD319                                         |
|                                                 | daratumumab                                   | CD38                                          |
|                                                 | Daratumumab + hyaluronidase alfa              |                                               |
|                                                 | mogamulizumab                                 | CCR4                                          |
|                                                 | inotuzumab ozogamicin                         | CD22                                          |
| <b>Check point inhibitors, N = 7</b>            | ipilimumab                                    | CTLA-4                                        |
|                                                 | atezolizumab                                  | PD-L1                                         |
|                                                 | avelumab                                      | PD-L1                                         |
|                                                 | durvalumab                                    | PD-L1                                         |
|                                                 | cemiplimab                                    | PD-1                                          |
|                                                 | nivolumab                                     | PD-1                                          |
|                                                 | pembrolizumab                                 | PD-1                                          |
| <b>growth factor/tumour cell target, N = 17</b> | trastuzumab                                   | HER2                                          |
|                                                 | Trastuzumab + hyaluronidase alfa              |                                               |
|                                                 | cetuximab                                     | EGFR                                          |
|                                                 | bevacizumab                                   | VEGF                                          |
|                                                 | panitumumab                                   | EGFR                                          |
|                                                 | pertuzumab                                    | HER2                                          |
|                                                 | Pertuzumab + trastuzumab                      |                                               |
|                                                 | Pertuzumab + trastuzumab + hyaluronidase alfa |                                               |
|                                                 | trastuzumab emtansine                         | HER2                                          |
|                                                 | dinutuximab beta                              | GD2 disialoganglioside                        |
|                                                 | ramucirumab                                   | VEGF-2                                        |
|                                                 | necitumumab                                   | EGFR                                          |
|                                                 | olaratumab                                    | Platelet-derived growth factor receptor alpha |
|                                                 | aflibercept                                   | VEGF                                          |
|                                                 | ranibizumab                                   | VEGF A                                        |
|                                                 | brolocizumab                                  | VEGF A                                        |
|                                                 | burosumab                                     | fibroblast growth factor (FGF)                |

|                              |              |                                                             |
|------------------------------|--------------|-------------------------------------------------------------|
|                              | caplacizumab | von Willebrand factor                                       |
|                              | luspatercept | TGF- $\beta$ superfamily                                    |
|                              | evolocumab   | proprotein convertase subtilisin/kexin type 9 (PCSK9)       |
|                              | alirocumab   |                                                             |
|                              | eculizumab   | Complement C5                                               |
|                              | ravulizumab  | Complement C5                                               |
| <b>Other targets, N = 12</b> | denosumab    | Receptor activator of nuclear factor kappa-B ligand (RANKL) |
|                              | romosozumab  | sclerostin                                                  |
|                              | erenumab     |                                                             |
|                              | galcanezumab | calcitonin gene-related peptide (CGRP)                      |
|                              | fremanezumab |                                                             |
|                              | omalizumab   | IgE                                                         |

CTLA-4: cytotoxic T-lymphocyte-associated protein 4; CCR4: C-C chemokine receptor type 4; EpCAM: Epithelial cell adhesion molecule; HER2: human epidermal growth factor receptor 2; TNFRSF: tumour necrosis factor receptor superfamily; VEGF: vascular endothelial growth factor; TGF- $\beta$  superfamily: transforming growth factor beta superfamily

**Supplementary Table 2 Latest available year of health indicators**

---

| <b>Indicators</b>                                             | <b>Latest available year</b> | <b>Health indication</b>                                                                                                                                                                                                                                                                                      |
|---------------------------------------------------------------|------------------------------|---------------------------------------------------------------------------------------------------------------------------------------------------------------------------------------------------------------------------------------------------------------------------------------------------------------|
| Gross domestic productivity                                   | 2020                         | The standard measure of the value added created through the production of goods and services in a country during a certain period. <sup>1</sup>                                                                                                                                                               |
| Human development index                                       | 2019                         | Three dimensions comprehensive indicator and often used when two countries have similar economic level but with different development performance <sup>2</sup>                                                                                                                                                |
| Percentage of health expenditure in total general expenditure | 2014                         | A core indicator of health financing systems. It contributes to understand the weight of public spending on health within the total value of public sector operations. Health may not regarded as priority when a government attributes proportionately less of its total expenditure on health. <sup>3</sup> |
| Life expectance at birth                                      | 2019                         | Overall indicator for health including living standards, lifestyle, education and access to quality health service <sup>4</sup>                                                                                                                                                                               |
| Service coverage index (SCI)                                  | 2019                         | The major indicator for universal health coverage that focuses on assessment on essential health services <sup>5,6</sup>                                                                                                                                                                                      |
| Doctor density                                                | 2010                         | An indicator of health systems resources – health workforce, which is one target of WHO sustainable development <sup>7,8</sup>                                                                                                                                                                                |

---

**Supplementary Figure 1 Biologics selection flow**

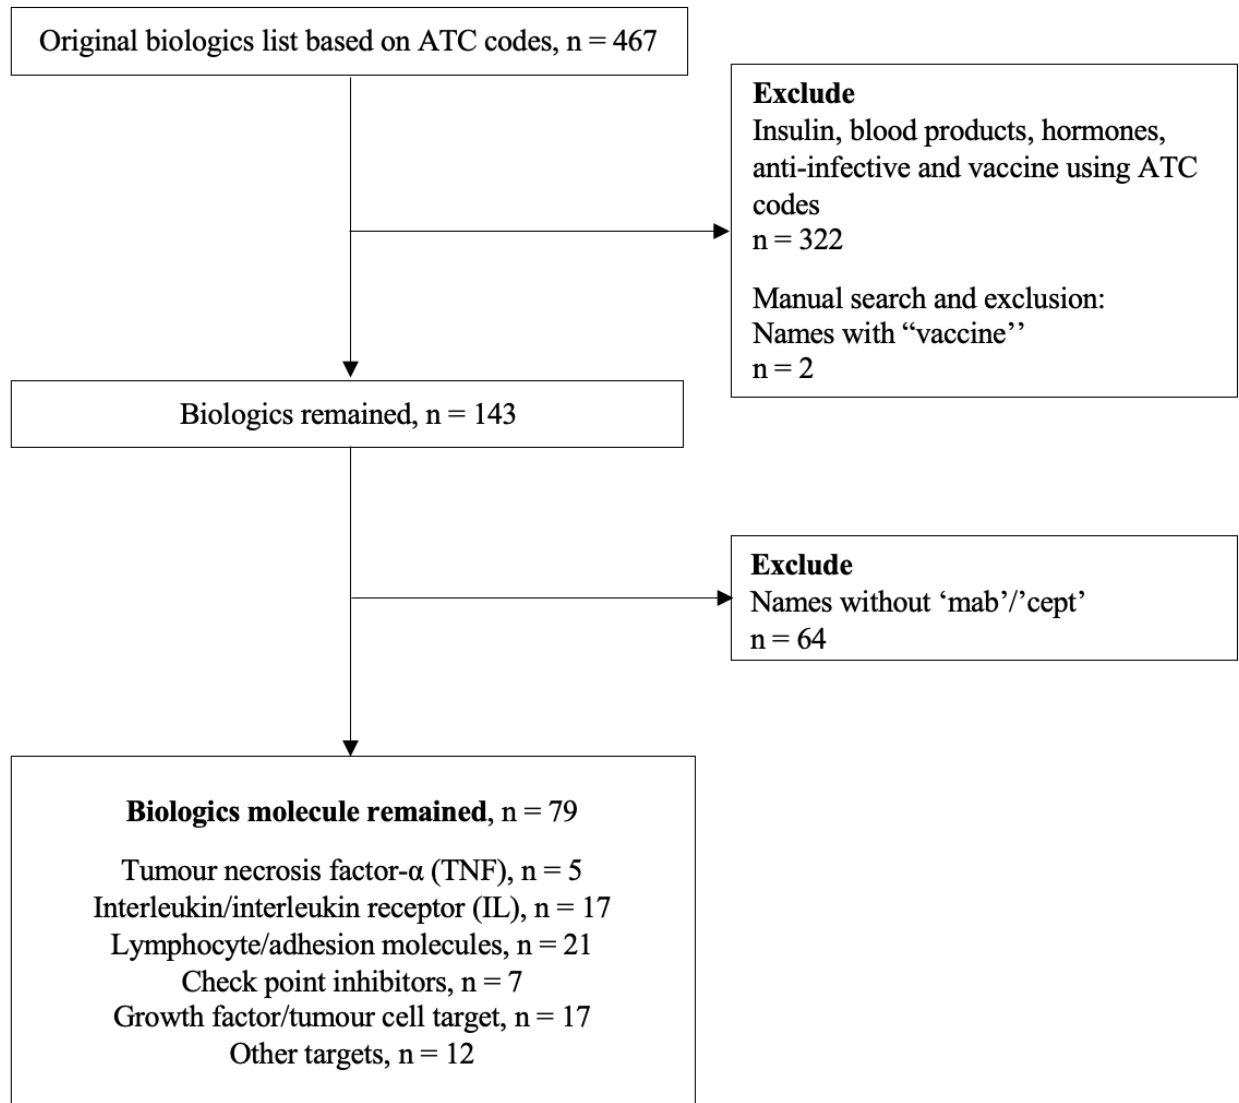

**Supplementary Figure 2 Proportion of biologics by mode of action for each country**

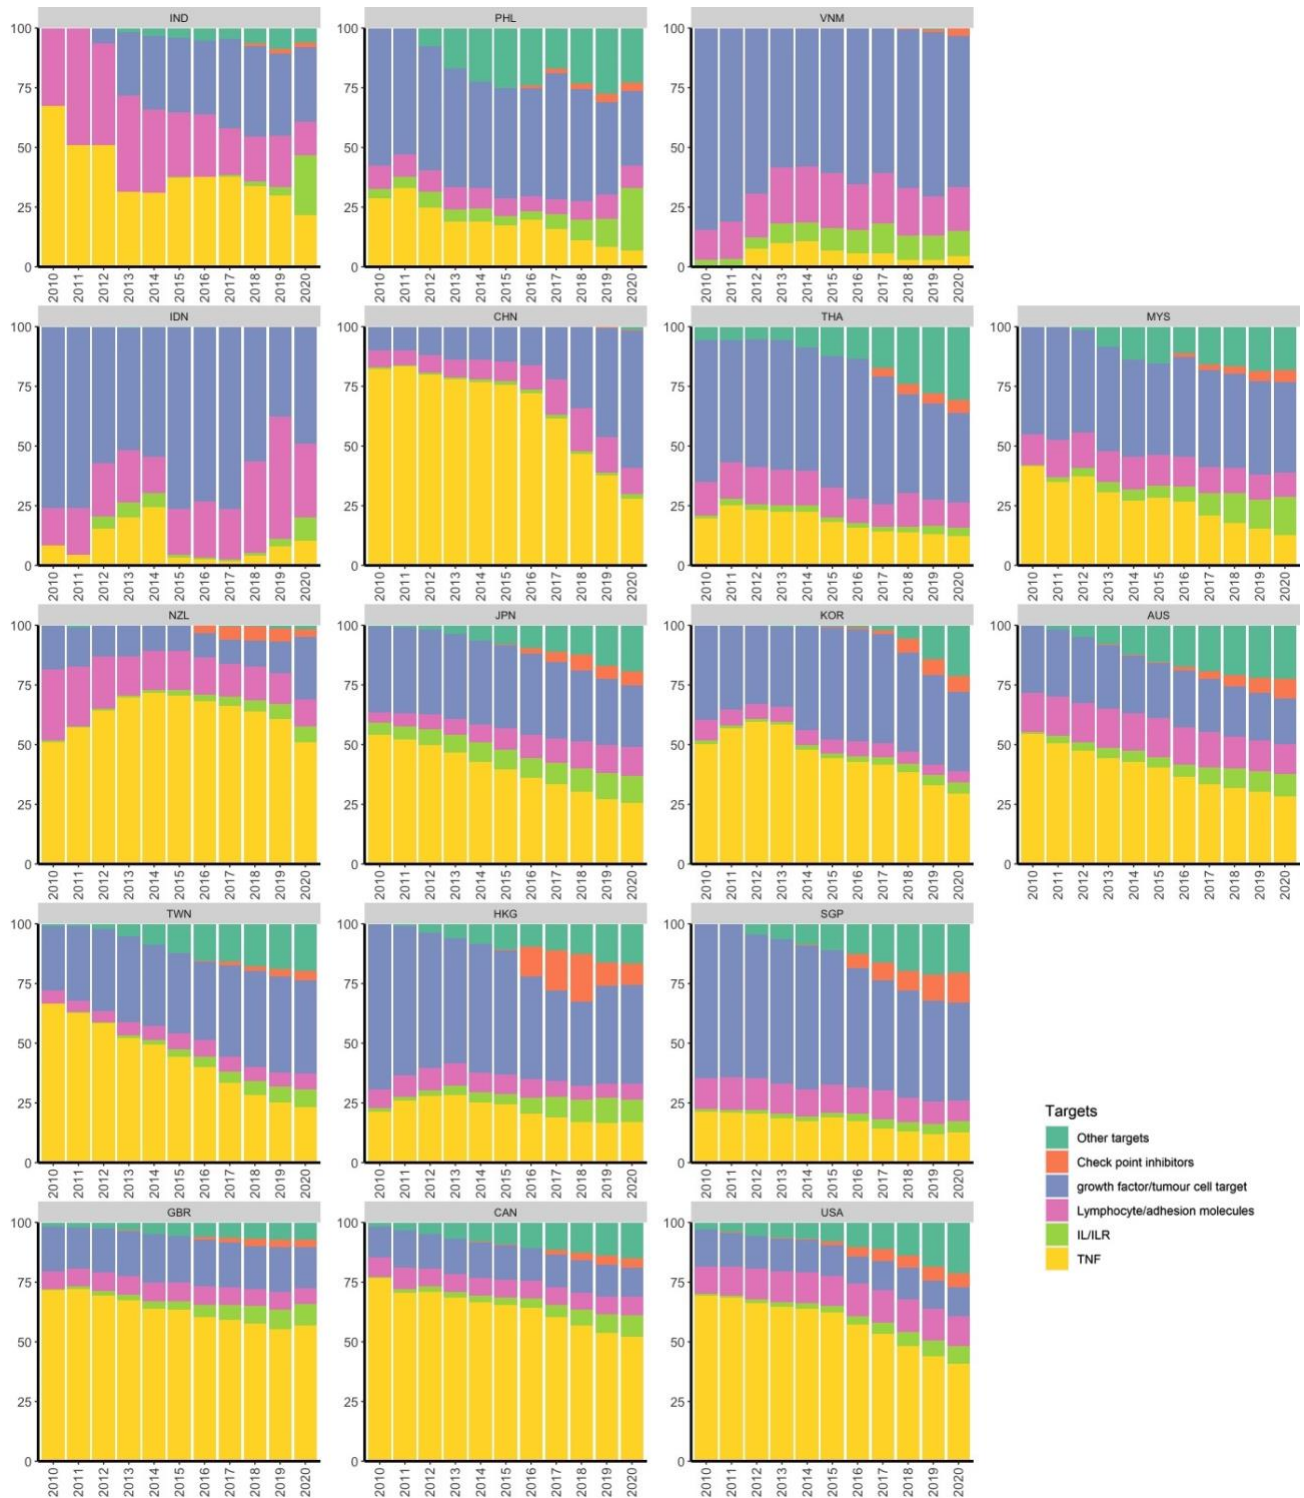

Abbreviation: TNF: targeting on tumour necrosis factor; IL/ILR: targeting on interleukins/interleukin receptors; IND: India, PHL: Philippines, VNM: Vietnam, IDN: Indonesia, CHN: China, THA: Thailand, MYS: Malaysia, NZL: New Zealand, JPN: Japan, KOR: Korea, AUS: Australia, TWN: Taiwan, HKG: Hong Kong, SGP: Singapore, GBR: United Kingdom, CAN: Canada, US: United States.

**Supplementary Figure 3. Yearly bio-originators and biosimilars consumption (Standard Units/1000 population) by country/region**

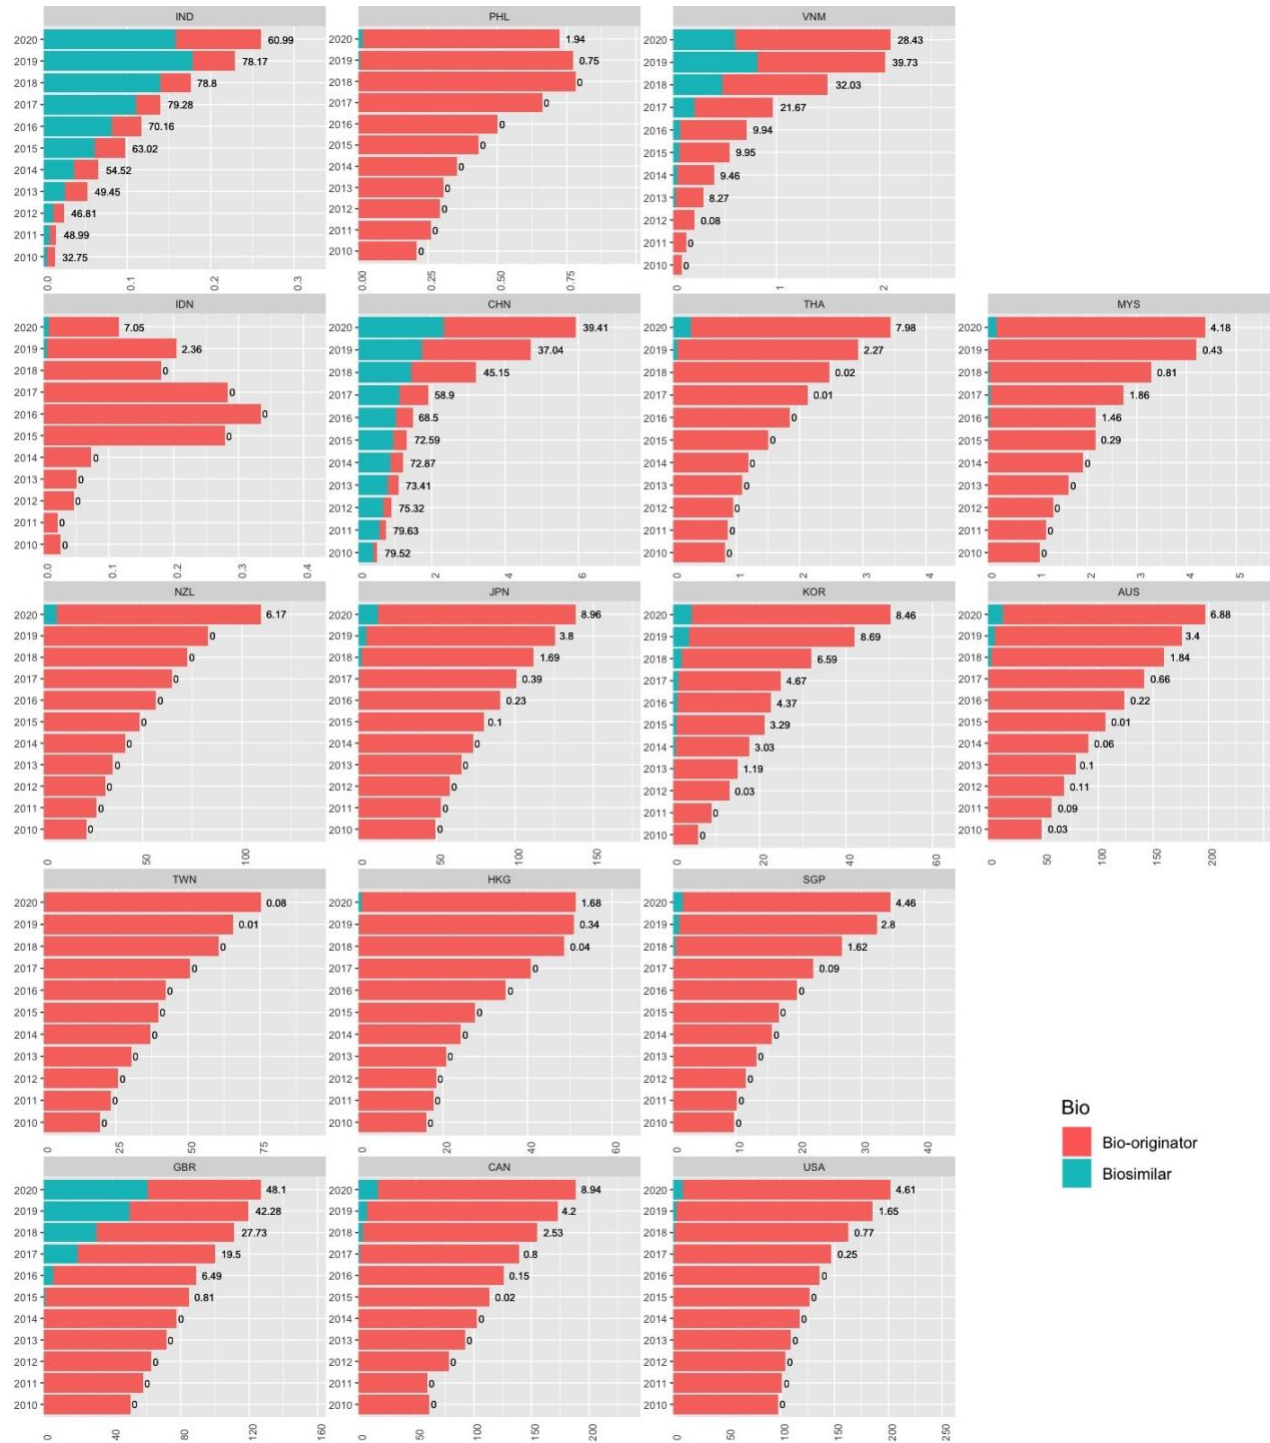

Notes: x axis represents for Standard Units/1000 population; y axis represents for year; labels by bar represents for percentage of biosimilar.

Abbreviation: IND: India, PHL: Philippines, VNM: Vietnam, IDN: Indonesia, CHN: China, THA: Thailand, MYS: Malaysia, NZL: New Zealand, JPN: Japan, KOR: Korea, AUS: Australia, TWN: Taiwan, HKG: Hong Kong, SGP: Singapore, GBR: United Kingdom, CAN: Canada, US: United States.

**Supplementary Figure 4. Annual growth rate of consumption and expenditure by MOA**

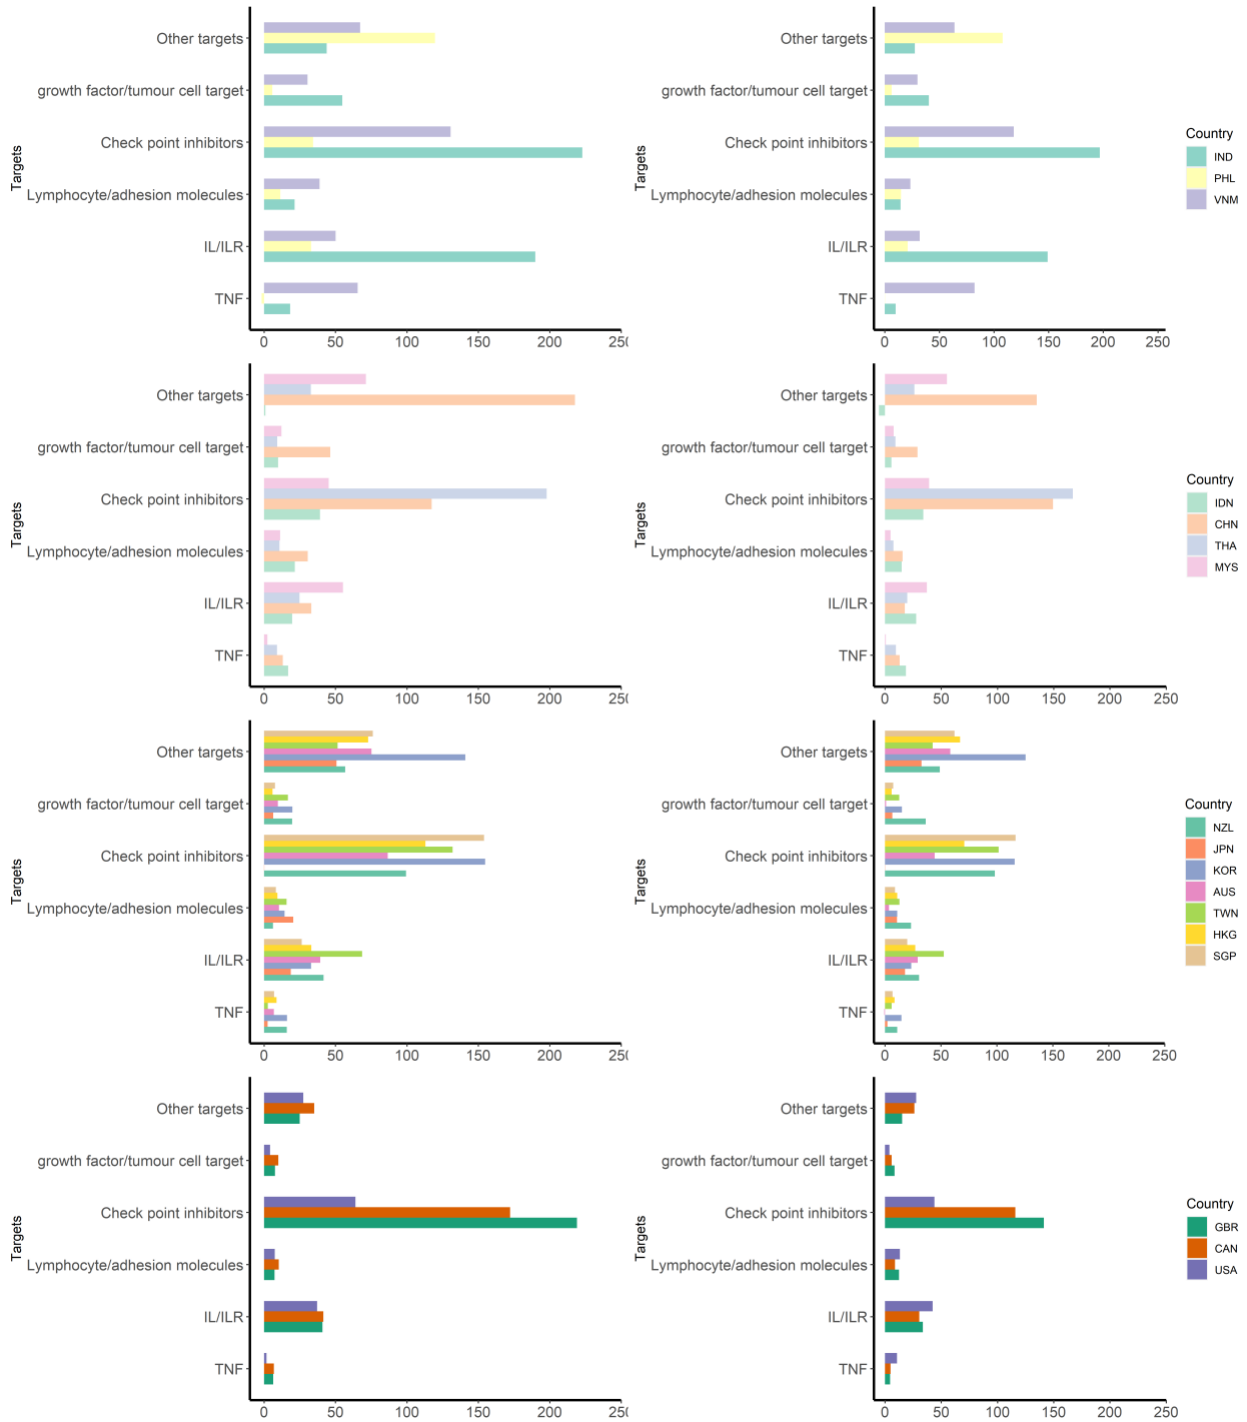

Abbreviation: TNF: targeting on tumour necrosis factor; IL/ILR: targeting on interleukins/interleukin receptors; IND: India, PHL: Philippines, VNM: Vietnam, IDN: Indonesia, CHN: China, THA: Thailand, MYS: Malaysia, NZL: New Zealand, JPN: Japan, KOR: Korea, AUS: Australia, TWN: Taiwan, HKG: Hong Kong, SGP: Singapore, GBR: United Kingdom, CAN: Canada, US: United States.



**Supplementary Figure 5 Sales volumes of biological medicine in different health systems among middle-income economies**

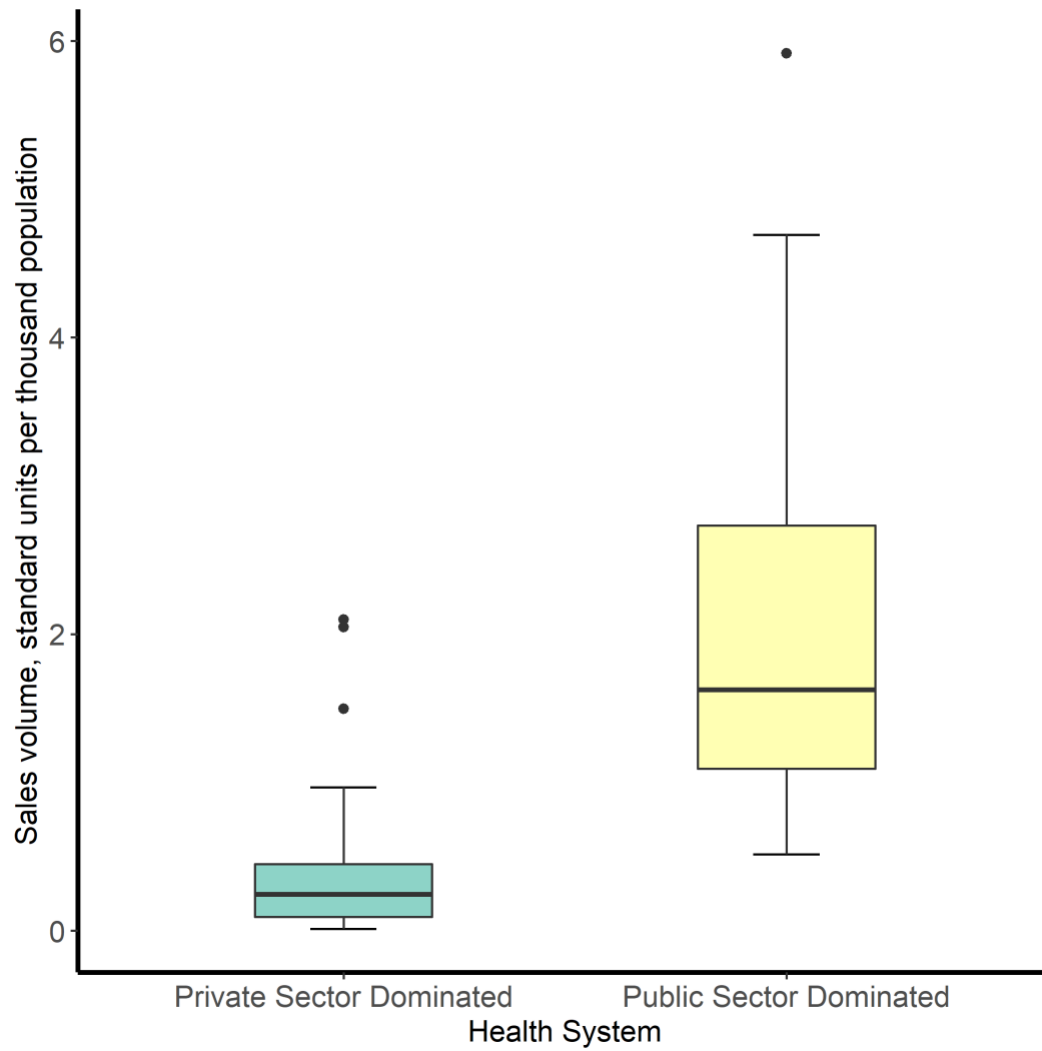

Countries with private sector dominated health system: India, Philippines, Vietnam, and Indonesia.  
Countries/Regions with public sector dominated health system: China, Thailand and Malaysia.

## References:

1. OECD Data. Gross domestic product (GDP). <https://data.oecd.org/gdp/gross-domestic-product-gdp.htm#:~:text=Gross%20domestic%20product%20%28GDP%29%20is%20the%20standard%20measure,spent%20on%20final%20goods%20and%20services%20%28less%20imports%29>.
2. United Nations Development Programme. Human Development Reports. [http://hdr.undp.org/en/content/human-development-index-hdi#:~:text=The%20Human%20Development%20Index%20\(HDI,a%20decent%20standard%20of%20living.&text=The%20HDI%20uses%20the%20logarithm,of%20income%20with%20increasing%20GNI](http://hdr.undp.org/en/content/human-development-index-hdi#:~:text=The%20Human%20Development%20Index%20(HDI,a%20decent%20standard%20of%20living.&text=The%20HDI%20uses%20the%20logarithm,of%20income%20with%20increasing%20GNI).
3. World Health Organization. General government expenditure on health as a percentage of total government expenditure. <https://www.who.int/data/gho/data/indicators/indicator-details/GHO/general-government-expenditure-on-health-as-a-percentage-of-total-government-expenditure>.
4. OECD Data. Life expectancy at birth. <https://data.oecd.org/healthstat/life-expectancy-at-birth.htm>.
5. World Health Organization. Sustainable Development Goals (SDGs). [https://www.who.int/health-topics/sustainable-development-goals#tab=tab\\_2](https://www.who.int/health-topics/sustainable-development-goals#tab=tab_2).
6. World Health Organization. Indicator 3.8.1: Coverage of essential health services: Universal Health Coverage index. <https://www.who.int/data/gho/data/themes/topics/indicator-groups/indicator-group-details/GHO/universal-health-coverage-index>.
7. World Health Organization. Medical doctors (per 10 000 population). [https://www.who.int/data/gho/data/indicators/indicator-details/GHO/medical-doctors-\(per-10-000-population\)](https://www.who.int/data/gho/data/indicators/indicator-details/GHO/medical-doctors-(per-10-000-population)).
8. World Health Organization. Global Health Workforce statistics database. 2021. <https://www.who.int/data/gho/data/themes/topics/health-workforce> (accessed August 25th 2021).
